# Supplementary material for: MOTS‐c promotes phosphorodiamidate morpholino oligomer uptake and efficacy in dystrophic mice
Source: PubMed Central journal article supplement (PMC7863382; doi:10.15252/emmm.202012993), 2020-12-18
Supplement: EMMM-13-e12993-s001.pdf [file EMMM-13-e12993-s001.pdf]

**MOTS-c promotes phosphorodiamidate morpholino oligomer uptake and efficacy in dystrophic mice**

Ning Ran<sup>1§</sup>, Caorui Lin<sup>1§</sup>, Ling Leng<sup>1</sup>, Gang Han<sup>2</sup>, Mengyuan Geng<sup>1</sup>, Yingjie Wu<sup>1</sup>,  
Scott Bittner<sup>3</sup>, Hong M Moulton<sup>3</sup>, HaiFang Yin<sup>1,4\*</sup>

**APPENDIX.**

**Contents: Appendix Figures S1 – S4**

**Appendix Figure S1 – Page 2**

**Systemic comparison between PMO-M and PMO in GF (PMO-GF) in adult *mdx* mice under identical conditions.**

**Appendix Figure S2 – Page 3**

**Western blot to examine dystrophin expression in the hearts of treated *mdx* mice.**

**Appendix Figure S3 – Page 4**

**Comparison between PMO-M and PMO in glycine (PMO-G) in adult *mdx* mice under identical conditions.**

**Appendix Figure S4 – Page 5**

**Morphological and pathological assessment of *mdx* mice treated with MOTS-c.**

**Appendix Table S1 – Page 6**

**Summary of exact P-values in figures**

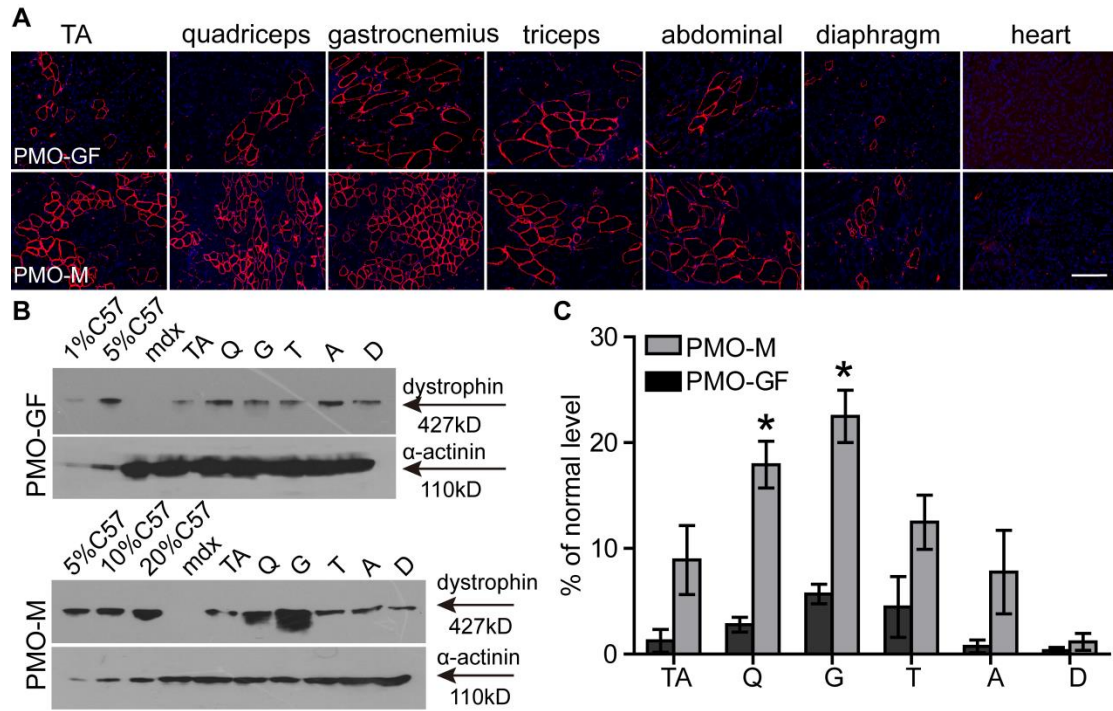

**Appendix Figure S1. Systemic comparison between PMO-M and PMO in GF (PMO-GF) in adult *mdx* mice under identical conditions.** PMO (12.5 mg/kg/week) mixed with MOTS-c (500  $\mu$ g) or PMO-GF (12.5 mg/kg/week) was administered into adult *mdx* mice for 3 weeks intravenously, respectively. **(A)** Immunohistochemistry of dystrophin-positive fibers in body-wide muscles from treated *mdx* mice (scale bar=100  $\mu$ m). Western blot **(B)** and quantitative analysis **(C)** for dystrophin expression in body-wide muscles from treated *mdx* mice (n=3; \*p<0.05, two-tailed t test). TA-tibialis anterior, Q-quadriceps, G-gastrocnemius, T-triceps, A-abdominal muscle, D-diaphragm. 0.5  $\mu$ g, 2.5  $\mu$ g, 5  $\mu$ g and 1  $\mu$ g total protein from *C57BL/6* and 50  $\mu$ g of muscle samples from untreated and treated *mdx* mice were loaded.  $\alpha$ -actinin was used as the loading control. Data were presented as mean  $\pm$ sem.

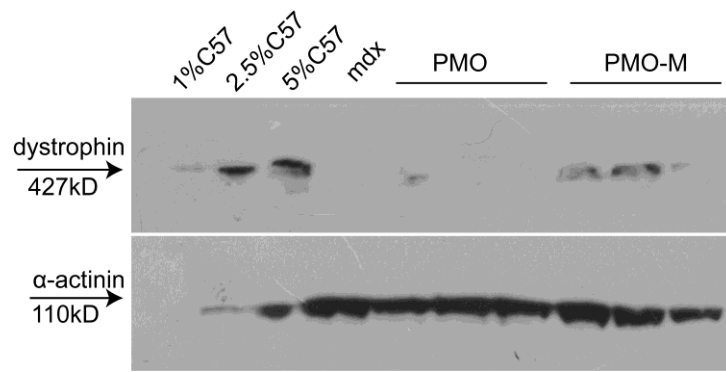

**Appendix Figure S2. Western blot to examine dystrophin expression in the hearts of treated *mdx* mice.** PMO-M was administered intravenously into adult *mdx* mice at the PMO dose of 12.5 mg/kg/week for 3 weeks followed by 12.5 mg/kg/month for 3 months and tissues were harvested two weeks after last injection. 1  $\mu$ g, 5  $\mu$ g and 10  $\mu$ g total protein from *C57BL/6* and 100  $\mu$ g of muscle samples from untreated and treated *mdx* mice were loaded.  $\alpha$ -actinin was used as the loading control.

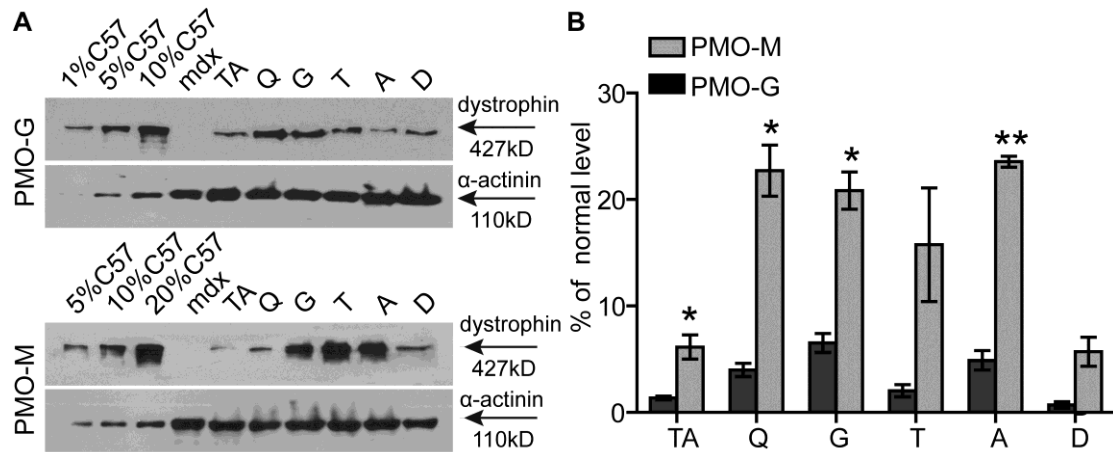

**Appendix Figure S3. Systemic comparison between PMO-M and PMO in glycine**

**(PMO-G) in adult *mdx* mice under identical conditions.** PMO (25 mg/kg/week)

mixed with MOTS-c (500  $\mu$ g) or PMO-G (25 mg/kg/week) was administered into adult *mdx* mice for 3 weeks intravenously, respectively. Western blot (A) and

quantitative analysis (B) for dystrophin expression in body-wide muscles from *mdx* mice treated with PMO-G (n=4) or PMO-M (n=3) (\*p<0.05, \*\*p<0.001, two-tailed t

test). The abbreviation is the same as Appendix Figure S1B. 0.5  $\mu$ g, 2.5  $\mu$ g, 5  $\mu$ g and 10  $\mu$ g total protein from *C57BL/6* and 50  $\mu$ g of muscle samples from untreated and

treated *mdx* mice were loaded.  $\alpha$ -actinin was used as the loading control. Data were presented as mean  $\pm$  sem.

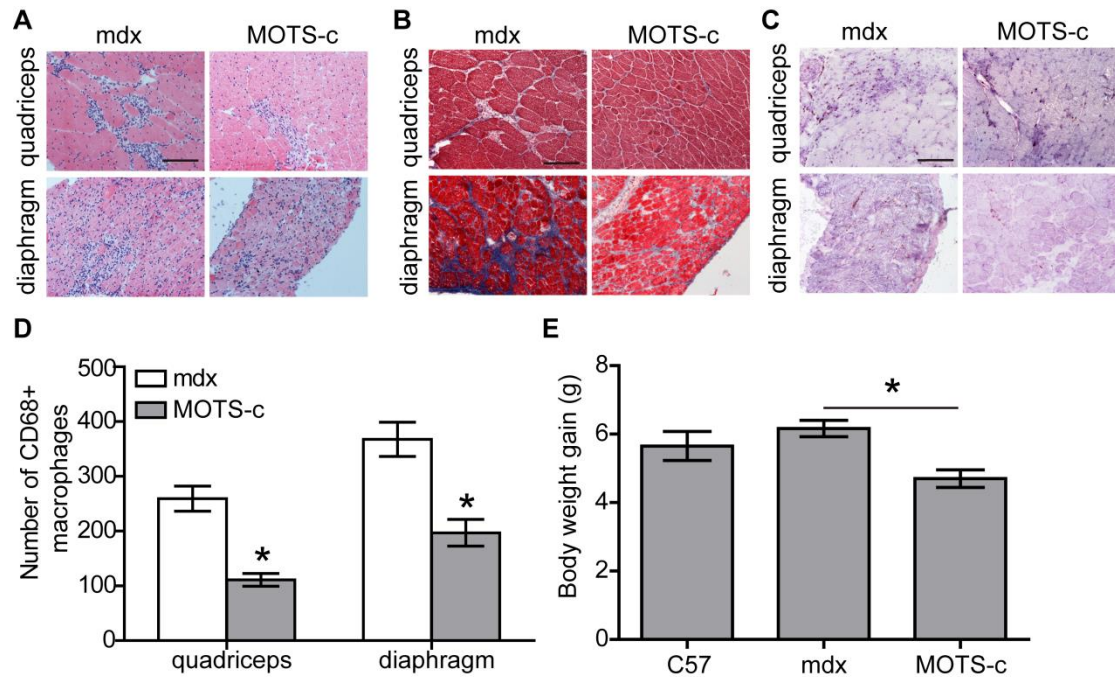

**Appendix Figure S4. Morphological and pathological assessment of *mdx* mice**

**treated with MOTS-c.** MOTS-c (500  $\mu$ g) was administered into adult *mdx* mice weekly for 3 weeks, followed by monthly injection for 3 months intravenously.

Muscles were harvested 2 weeks after last injection. **(A)** H&E staining of quadriceps and diaphragm from treated *mdx* mice (scale bar=100  $\mu$ m). **(B)** Masson's trichrome staining for quadriceps and diaphragm from treated *mdx* mice (scale bar=100 $\mu$ m).

Immunohistochemistry **(C)** and quantitative analysis **(D)** of CD68<sup>+</sup> macrophages in quadriceps and diaphragm from *mdx* mice treated with MOTS-c (n=4) or untreated *mdx* controls (n=3) (scale bar=100  $\mu$ m) (\*p<0.05, two-tailed t test).

**(E)** Measurement of body-weight changes of *mdx* mice treated with MOTS-c (n=4), untreated *mdx* (n=3) and wild-type controls (n=3) (\*p<0.05, One way-ANOVA post hoc Student-Newman-Keuls test). Data were presented as mean  $\pm$ sem.

**Appendix Table S1: Summary of exact p-values in each figure**

| Figure  |       | comparison               | P value   | Statistical test  |
|---------|-------|--------------------------|-----------|-------------------|
| Fig.1A  | 30min | H2Kmdx v.s H2Kmdx +MOTSc | 0.013     | two-tailed t test |
|         | 40min | H2Kmdx v.s H2Kmdx +MOTSc | 0.001     | two-tailed t test |
|         | 50min | H2Kmdx v.s H2Kmdx +MOTSc | 0.011     | two-tailed t test |
|         | 30min | H2K v.s H2K+MOTSc        | 0.002     | two-tailed t test |
|         | 40min | H2K v.s H2K+MOTSc        | 0.028     | two-tailed t test |
|         | 50min | H2K v.s H2K+MOTSc        | 0.006     | two-tailed t test |
| Fig.1B  |       | H2K v.s H2Kmdx           | 0.005     | two-tailed t test |
| Fig. 1C |       | NC v.s MOTSc (H2Kmdx)    | 0.041     | two-tailed t test |
| Fig. 1D | TA    | NC v.s MOTSc             | 0.045     | two-tailed t test |
|         | Q     | NC v.s MOTSc             | 0.045     | two-tailed t test |
|         | G     | NC v.s MOTSc             | 0.039     | two-tailed t test |
|         | T     | NC v.s MOTSc             | 0.034     | two-tailed t test |
|         | A     | NC v.s MOTSc             | 0.041     | two-tailed t test |
|         | D     | NC v.s MOTSc             | 0.26      | two-tailed t test |
|         | H     | NC v.s MOTSc             | 0.41      | two-tailed t test |
|         | Li    | NC v.s MOTSc             | 0.00017   | two-tailed t test |
|         | S     | NC v.s MOTSc             | 0.15      | two-tailed t test |
|         | Lu    | NC v.s MOTSc             | 0.02      | two-tailed t test |
|         | K     | NC v.s MOTSc             | 0.14      | two-tailed t test |
| Fig.1E  | Q     | NC v.s MOTSc             | 0.023     | two-tailed t test |
|         | D     | NC v.s MOTSc             | 0.006     | two-tailed t test |
|         | A     | NC v.s MOTSc             | 0.004     | two-tailed t test |
| Fig.2A  |       | Fluorescence intensity   | 4.448E-07 | two-tailed t test |
| Fig.2C  | TA    | PMO v.s PMO-M            | 0.191     | two-tailed t test |
|         | Q     | PMO v.s PMO-M            | 0.003     | two-tailed t test |
|         | G     | PMO v.s PMO-M            | 0.034     | two-tailed t test |
|         | T     | PMO v.s PMO-M            | 0.187     | two-tailed t test |
|         | A     | PMO v.s PMO-M            | 0.027     | two-tailed t test |
|         | D     | PMO v.s PMO-M            | 0.921     | two-tailed t test |
|         | H     | PMO v.s PMO-M            | 0.641     | two-tailed t test |
|         | Li    | PMO v.s PMO-M            | 0.932     | two-tailed t test |
|         | S     | PMO v.s PMO-M            | 0.463     | two-tailed t test |
|         | Lu    | PMO v.s PMO-M            | 0.196     | two-tailed t test |
|         | K     | PMO v.s PMO-M            | 0.032     | two-tailed t test |
| Fig.2E  |       | PMO v.s PMO-M            | 0.000884  | two-tailed t test |

|        |         |               |          |                                                     |
|--------|---------|---------------|----------|-----------------------------------------------------|
| Fig.2F |         | PMO v.s PMO-M | 0.0143   | two-tailed t test                                   |
| Fig.2I | TA      | PMO v.s PMO-M | 0.018    | two-tailed t test                                   |
|        | Q       | PMO v.s PMO-M | 0.02     | two-tailed t test                                   |
|        | G       | PMO v.s PMO-M | 0.028    | two-tailed t test                                   |
|        | T       | PMO v.s PMO-M | 0.001    | two-tailed t test                                   |
|        | A       | PMO v.s PMO-M | 0.015    | two-tailed t test                                   |
|        | D       | PMO v.s PMO-M | 0.020    | two-tailed t test                                   |
| Fig.3F | TA      | PMO v.s PMO-M | 0.1      | two-tailed t test                                   |
|        | Q       | PMO v.s PMO-M | 0.002    | two-tailed t test                                   |
|        | G       | PMO v.s PMO-M | 0.002    | two-tailed t test                                   |
|        | T       | PMO v.s PMO-M | 0.1      | two-tailed t test                                   |
|        | A       | PMO v.s PMO-M | 0.013    | two-tailed t test                                   |
|        | D       | PMO v.s PMO-M | 0.1      | two-tailed t test                                   |
| Fig.3H | TA      | PMO v.s PMO-M | 0.218    | two-tailed t test                                   |
|        | Q       | PMO v.s PMO-M | 0.044    | two-tailed t test                                   |
|        | G       | PMO v.s PMO-M | 0.024    | two-tailed t test                                   |
|        | T       | PMO v.s PMO-M | 0.115    | two-tailed t test                                   |
|        | A       | PMO v.s PMO-M | 0.7      | two-tailed t test                                   |
|        | D       | PMO v.s PMO-M | 0.506    | two-tailed t test                                   |
| Fig.4C | TA      | PMO v.s PMO-M | 0.00065  | two-tailed t test                                   |
|        | Q       | PMO v.s PMO-M | 0.00091  | two-tailed t test                                   |
|        | G       | PMO v.s PMO-M | 2.85E-05 | two-tailed t test                                   |
|        | T       | PMO v.s PMO-M | 0.000363 | two-tailed t test                                   |
|        | A       | PMO v.s PMO-M | 0.03     | two-tailed t test                                   |
|        | D       | PMO v.s PMO-M | 0.000276 | two-tailed t test                                   |
| Fig.4E | TA      | PMO v.s PMO-M | 0.019    | two-tailed t test                                   |
|        | Q       | PMO v.s PMO-M | 0.002    | two-tailed t test                                   |
|        | G       | PMO v.s PMO-M | 0.006    | two-tailed t test                                   |
|        | T       | PMO v.s PMO-M | 0.001    | two-tailed t test                                   |
|        | A       | PMO v.s PMO-M | 0.004    | two-tailed t test                                   |
|        | D       | PMO v.s PMO-M | 0.030    | two-tailed t test                                   |
| Fig.4F | 6 Weeks | mdx v.s PMO   | 0.469    | One way-ANOVA post hoc<br>Student-Newman-Keuls test |
|        |         | mdx v.s PMO-M | 0.021    | One way-ANOVA post hoc<br>Student-Newman-Keuls test |
|        |         | PMO v.s PMO-M | 0.032    | One way-ANOVA post hoc<br>Student-Newman-Keuls test |

|        |          |               |          |                                                     |
|--------|----------|---------------|----------|-----------------------------------------------------|
|        | 10 Weeks | mdx v.s PMO   | 0.412    | One way-ANOVA post hoc<br>Student-Newman-Keuls test |
|        |          | mdx v.s PMO-M | 0.004    | One way-ANOVA post hoc<br>Student-Newman-Keuls test |
|        |          | PMO v.s PMO-M | 0.006    | One way-ANOVA post hoc<br>Student-Newman-Keuls test |
|        | 14 Weeks | mdx v.s PMO   | 0.22     | One way-ANOVA post hoc<br>Student-Newman-Keuls test |
|        |          | mdx v.s PMO-M | 0.000959 | One way-ANOVA post hoc<br>Student-Newman-Keuls test |
|        |          | PMO v.s PMO-M | 0.000912 | One way-ANOVA post hoc<br>Student-Newman-Keuls test |
|        | 16 Weeks | mdx v.s PMO   | 0.749    | One way-ANOVA post hoc<br>Student-Newman-Keuls test |
|        |          | mdx v.s PMO-M | 0.002    | One way-ANOVA post hoc<br>Student-Newman-Keuls test |
|        |          | PMO v.s PMO-M | 0.002    | One way-ANOVA post hoc<br>Student-Newman-Keuls test |
| Fig.4G |          | mdx v.s PMO   | 0.688    | One way-ANOVA post hoc<br>Student-Newman-Keuls test |
|        |          | mdx v.s PMO-M | 0.025    | One way-ANOVA post hoc<br>Student-Newman-Keuls test |



|        |            |               |          |                                                     |
|--------|------------|---------------|----------|-----------------------------------------------------|
|        |            | PMO v.s PMO-M | 0.021    | One way-ANOVA post hoc<br>Student-Newman-Keuls test |
| Fig.5A |            | mdx v.s PMO   | 0.754    | One way-ANOVA post hoc<br>Student-Newman-Keuls test |
|        |            | mdx v.s PMO-M | 0.026    | One way-ANOVA post hoc<br>Student-Newman-Keuls test |
|        |            | PMO v.s PMO-M | 0.019    | One way-ANOVA post hoc<br>Student-Newman-Keuls test |
| Fig.5D | Quadriceps | mdx v.s PMO   | 0.461    | One way-ANOVA post hoc<br>Student-Newman-Keuls test |
|        |            | mdx v.s PMO-M | 4.44E-05 | One way-ANOVA post hoc<br>Student-Newman-Keuls test |
|        |            | PMO v.s PMO-M | 1.92E-05 | One way-ANOVA post hoc<br>Student-Newman-Keuls test |
|        | Triceps    | mdx v.s PMO   | 0.884    | One way-ANOVA post hoc<br>Student-Newman-Keuls test |
|        |            | mdx v.s PMO-M | 0.000462 | One way-ANOVA post hoc<br>Student-Newman-Keuls test |
|        |            | PMO v.s PMO-M | 0.000131 | One way-ANOVA post hoc<br>Student-Newman-Keuls test |
| Fig.5E | <500       | PMO v.s PMO-M | 0.13     | two-tailed t test                                   |
|        | 500-1000   | PMO v.s PMO-M | 0.042    | two-tailed t test                                   |
|        | 1000-1500  | PMO v.s PMO-M | 0.363    | two-tailed t test                                   |
|        | 1500-2000  | PMO v.s PMO-M | 0.383    | two-tailed t test                                   |

|        |                 |               |       |                                                     |
|--------|-----------------|---------------|-------|-----------------------------------------------------|
|        | 2000-2500       | PMO v.s PMO-M | 0.881 | two-tailed t test                                   |
|        | 2500-3000       | PMO v.s PMO-M | 0.15  | two-tailed t test                                   |
|        | 3000-3500       | PMO v.s PMO-M | 0.224 | two-tailed t test                                   |
|        | 3500-4000       | PMO v.s PMO-M | 0.543 | two-tailed t test                                   |
|        | 4000-4500       | PMO v.s PMO-M | 0.434 | two-tailed t test                                   |
|        | >4500           | PMO v.s PMO-M | 0.870 | two-tailed t test                                   |
| Fig.6A | AST             | mdx v.s PMO   | 0.859 | One way-ANOVA post hoc<br>Student-Newman-Keuls test |
|        |                 | mdx v.s PMO-M | 0.019 | One way-ANOVA post hoc<br>Student-Newman-Keuls test |
|        |                 | PMO v.s PMO-M | 0.016 | One way-ANOVA post hoc<br>Student-Newman-Keuls test |
|        | ALT             | mdx v.s PMO   | 0.84  | One way-ANOVA post hoc<br>Student-Newman-Keuls test |
|        |                 | mdx v.s PMO-M | 0.005 | One way-ANOVA post hoc<br>Student-Newman-Keuls test |
|        |                 | PMO v.s PMO-M | 0.014 | One way-ANOVA post hoc<br>Student-Newman-Keuls test |
|        | GGT             | mdx v.s PMO   | 0.753 | One way-ANOVA post hoc<br>Student-Newman-Keuls test |
|        |                 | mdx v.s PMO-M | 0.051 | One way-ANOVA post hoc<br>Student-Newman-Keuls test |
|        |                 | PMO v.s PMO-M | 0.288 | One way-ANOVA post hoc<br>Student-Newman-Keuls test |
| Fig.6E | CD68-Quadriceps | mdx v.s PMO   | 0.012 | One way-ANOVA post hoc                              |

|  |                  |               |           |                                                     |
|--|------------------|---------------|-----------|-----------------------------------------------------|
|  |                  |               |           | Student-Newman-Keuls test                           |
|  |                  | mdx v.s PMO-M | 0.00083   | One way-ANOVA post hoc<br>Student-Newman-Keuls test |
|  |                  | PMO v.s PMO-M | 0.003     | One way-ANOVA post hoc<br>Student-Newman-Keuls test |
|  | CD68-Diaphragm   | mdx v.s PMO   | 0.370     | One way-ANOVA post hoc<br>Student-Newman-Keuls test |
|  |                  | mdx v.s PMO-M | 0.003     | One way-ANOVA post hoc<br>Student-Newman-Keuls test |
|  |                  | PMO v.s PMO-M | 0.005     | One way-ANOVA post hoc<br>Student-Newman-Keuls test |
|  | CD11b-Quadriceps | mdx v.s PMO   | 0.011     | One way-ANOVA post hoc<br>Student-Newman-Keuls test |
|  |                  | mdx v.s PMO-M | 0.0009446 | One way-ANOVA post hoc<br>Student-Newman-Keuls test |
|  |                  | PMO v.s PMO-M | 0.005     | One way-ANOVA post hoc<br>Student-Newman-Keuls test |
|  | CD11b-Diaphragm  | mdx v.s PMO   | 0.208     | One way-ANOVA post hoc<br>Student-Newman-Keuls test |
|  |                  | mdx v.s PMO-M | 0.009     | One way-ANOVA post hoc<br>Student-Newman-Keuls test |
|  |                  | PMO v.s PMO-M | 0.027     | One way-ANOVA post hoc                              |

|          |                |                     |           |                                                     |
|----------|----------------|---------------------|-----------|-----------------------------------------------------|
|          |                |                     |           | Student-Newman-Keuls test                           |
|          | CD3-Quadriceps | mdx v.s PMO         | 0.804     | One way-ANOVA post hoc<br>Student-Newman-Keuls test |
|          |                | mdx v.s PMO-M       | 0.021     | One way-ANOVA post hoc<br>Student-Newman-Keuls test |
|          |                | PMO v.s PMO-M       | 0.013     | One way-ANOVA post hoc<br>Student-Newman-Keuls test |
|          | CD3-Diaphragm  | mdx v.s PMO         | 0.754     | One way-ANOVA post hoc<br>Student-Newman-Keuls test |
|          |                | mdx v.s PMO-M       | 0.049     | One way-ANOVA post hoc<br>Student-Newman-Keuls test |
|          |                | PMO v.s PMO-M       | 0.035     | One way-ANOVA post hoc<br>Student-Newman-Keuls test |
| Fig.EV1  | TA             | PMO-M vs PMO        | 0.005     | t test                                              |
|          | G              | PMO-M vs PMO        | 0.008     | t test                                              |
| Fig.EV2B |                | PMO-M vs PMO        | 0.0009125 | One way-ANOVA post hoc<br>Student-Newman-Keuls test |
|          |                | PMO-M vs. Seperated | 0.130     | One way-ANOVA post hoc<br>Student-Newman-Keuls test |
|          |                | Seperated vs. PMO   | 0.0012    | One way-ANOVA post hoc<br>Student-Newman-Keuls test |
| Fig.EV2D |                | PMO-M vs PMO        | 0.004     | One way-ANOVA post hoc<br>Student-Newman-Keuls test |

|              |                  |                         |          |                                                     |
|--------------|------------------|-------------------------|----------|-----------------------------------------------------|
|              |                  | PMO-M vs. Seperated     | 0.649    | One way-ANOVA post hoc<br>Student-Newman-Keuls test |
|              |                  | Seperated vs. PMO       | 0.003    | One way-ANOVA post hoc<br>Student-Newman-Keuls test |
| Fig. EV3B    | Soleus           | PMO-M vs PMO            | 0.005    | two-tailed t test                                   |
|              | EDL              | PMO-M vs PMO            | 0.014    | two-tailed t test                                   |
| Fig. EV4B    | Soleus           | PMO-M vs PMO            | 0.0012   | two-tailed t test                                   |
|              | EDL              | PMO-M vs PMO            | 0.003    | two-tailed t test                                   |
| Fig.EV5      | 0 week           | PMO-M vs PMO-M(+MOTS-c) | 0.529    | two-tailed t test                                   |
|              | 1 week           | PMO-M vs PMO-M(+MOTS-c) | 0.637    | two-tailed t test                                   |
|              | 2 week           | PMO-M vs PMO-M(+MOTS-c) | 0.18     | two-tailed t test                                   |
|              | 4 week           | PMO-M vs PMO-M(+MOTS-c) | 0.017    | two-tailed t test                                   |
|              | Body weight gain | PMO-M vs PMO-M(+MOTS-c) | 0.031    | two-tailed t test                                   |
| Appendix S1C | TA               | PMO-M vs PMO-GF         | 0.09     | two-tailed t test                                   |
|              | Q                | PMO-M vs PMO-GF         | 0.003    | two-tailed t test                                   |
|              | G                | PMO-M vs PMO-GF         | 0.003    | two-tailed t test                                   |
|              | T                | PMO-M vs PMO-GF         | 0.106    | two-tailed t test                                   |
|              | A                | PMO-M vs PMO-GF         | 0.154    | two-tailed t test                                   |
|              | D                | PMO-M vs PMO-GF         | 0.387    | two-tailed t test                                   |
| Appendix S3C | TA               | PMO-M vs PMO-G          | 0.048    | two-tailed t test                                   |
|              | Q                | PMO-M vs PMO-G          | 0.011    | two-tailed t test                                   |
|              | G                | PMO-M vs PMO-G          | 0.005    | two-tailed t test                                   |
|              | T                | PMO-M vs PMO-G          | 0.122    | two-tailed t test                                   |
|              | A                | PMO-M vs PMO-G          | 0.000465 | two-tailed t test                                   |
|              | D                | PMO-M vs PMO-G          | 0.061    | two-tailed t test                                   |
| Appendix S4D | Quadriceps       | mdx vs MOTS-c           | 0.001    | two-tailed t test                                   |
|              | Diaphragm        | mdx vs MOTS-c           | 0.008    | two-tailed t test                                   |
| Appendix S4E |                  | mdx vs. MOTS-c          | 0.027    | One way-ANOVA post hoc<br>Student-Newman-Keuls test |
|              |                  | mdx vs. C57             | 0.304    | One way-ANOVA post hoc<br>Student-Newman-Keuls      |

|  |  |                |       |                                                  |
|--|--|----------------|-------|--------------------------------------------------|
|  |  |                |       | test                                             |
|  |  | C57 vs. MOTS-c | 0.062 | One way-ANOVA post hoc Student-Newman-Keuls test |
