# Supplementary material for: MOTS‐c promotes phosphorodiamidate morpholino oligomer uptake and efficacy in dystrophic mice
Source: PubMed Central journal article supplement (PMC7863382; doi:10.15252/emmm.202012993), 2020-12-18
Supplement: EMMM-13-e12993-s002.pdf [file EMMM-13-e12993-s002.pdf]

## Expanded View Figures

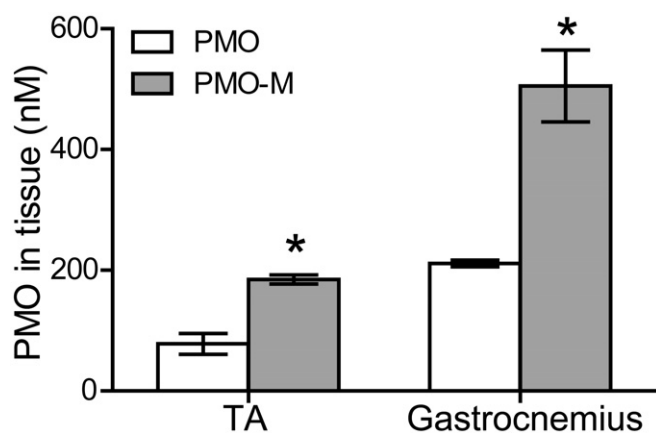

**Figure EV1. Measurement of PMO in muscle tissues of *mdx* mice.** FITC-labeled PMO (50 mg/kg) mixed with MOTS-c (500  $\mu$ g) (PMO-M) ( $n = 3$ ) or FITC-labeled PMO in saline (PMO) ( $n = 3$ ) was intravenously injected into *mdx* mice for once, and tissues were harvested 48 h later (\* $P < 0.05$ , two-tailed  $t$ -test). TA—tibialis anterior. Data information: Data were presented as mean  $\pm$  sem. Exact  $P$  values are specified in Appendix Table S1.

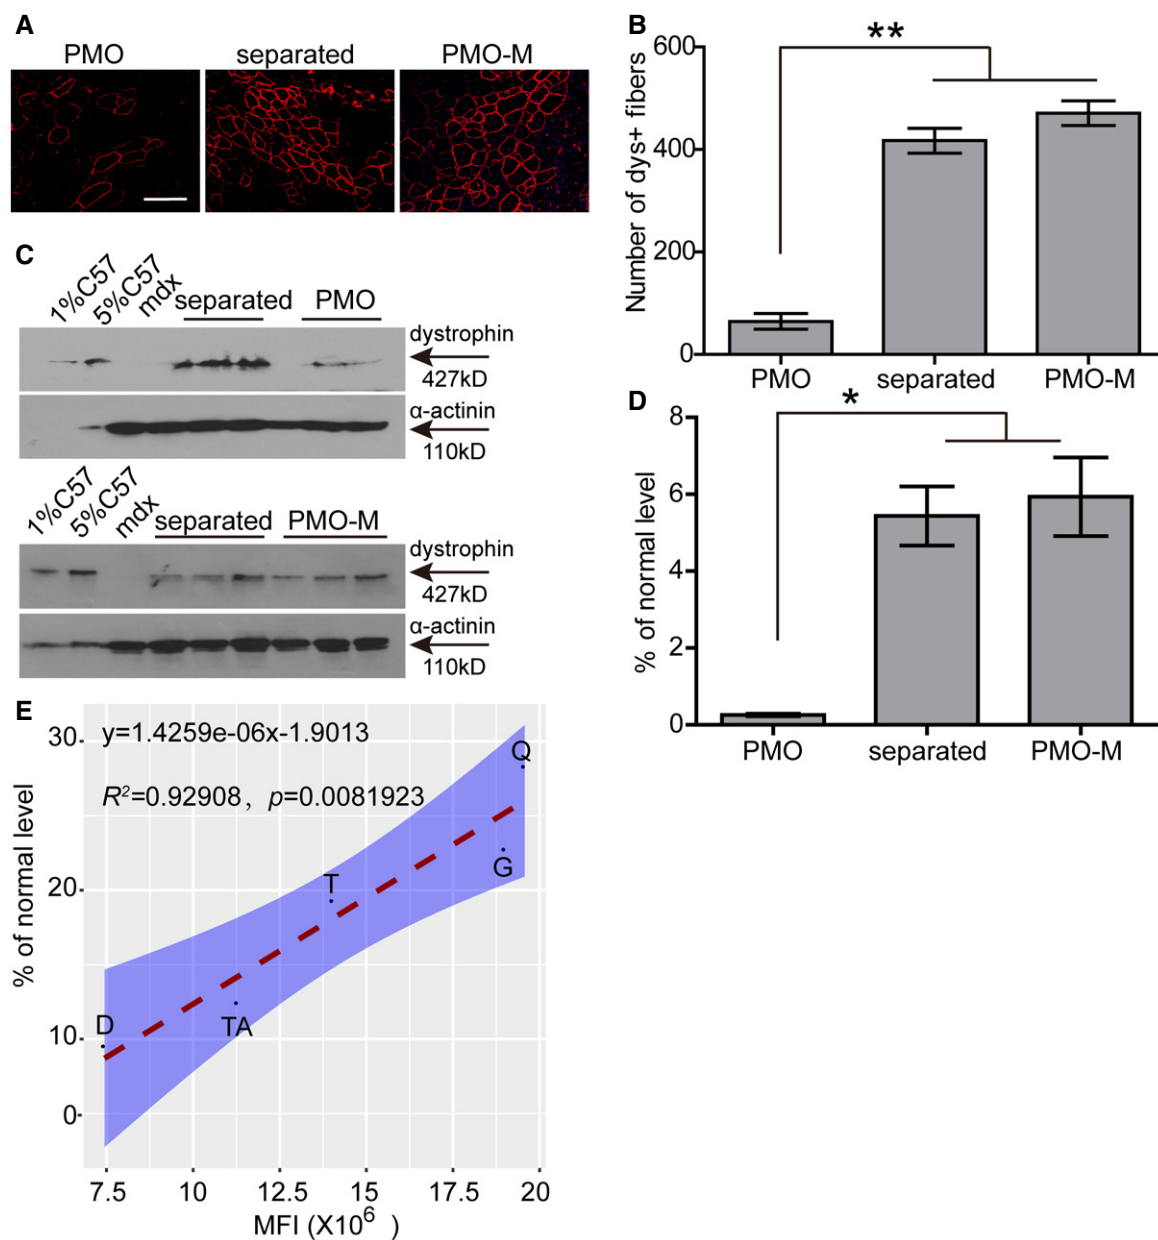

**Figure EV2. Evaluation of the direct effect of MOT5-c on PMO activity in *mdx* mice and correlation of efficacy/quantity of PMO in dystrophic muscles.**

PMO (0.5  $\mu$ g) in saline was administered into TA muscles of adult *mdx* mice, and MOT5-c (500  $\mu$ g) was simultaneously injected into the same mice intravenously, and muscles were harvested 2 weeks after injection.

- A, B Immunohistochemistry (A) and quantitative analysis (B) of dystrophin-positive fibers in TA muscles from treated *mdx* mice (scale bar: 100  $\mu$ m) ( $n = 3$ ;  $**P < 0.001$ , one-way ANOVA post hoc Student–Newman–Keuls test). PMO-M means PMO mixed with MOT5-c, and PMO refers to PMO alone (the same is for the rest unless otherwise specified). Separated refers to intramuscular injection of PMO with simultaneous systemic injection of MOT5-c.
- C, D Western blot (C) and quantitative analysis (D) of dystrophin expression in TA muscles from treated *mdx* mice ( $n = 3$ ;  $*P < 0.05$ , one-way ANOVA post hoc Student–Newman–Keuls test). 0.5  $\mu$ g and 2.5  $\mu$ g total protein from C57BL/6 and 50  $\mu$ g of muscle samples from untreated and treated *mdx* mice were loaded.  $\alpha$ -actinin was used as the loading control.
- E Analysis of the correlation between quantity and efficacy of PMO in dystrophic muscles following systemic injection. Adult *mdx* mice were treated with PMO-M intravenously at the PMO dose of 50 mg/kg/week for 3 weeks, and muscles were harvested two weeks after last injection to examine dystrophin expression. Fluorescence intensity was measured 48 h after single intravenous injection of FITC-labeled PMO (50mg/kg) into adult *mdx* mice. TA—tibialis anterior, Q—quadriceps, G—gastrocnemius, T—triceps, D—diaphragm.

Data information: Data were presented as mean  $\pm$  sem. Exact *P* values are specified in Appendix Table S1.

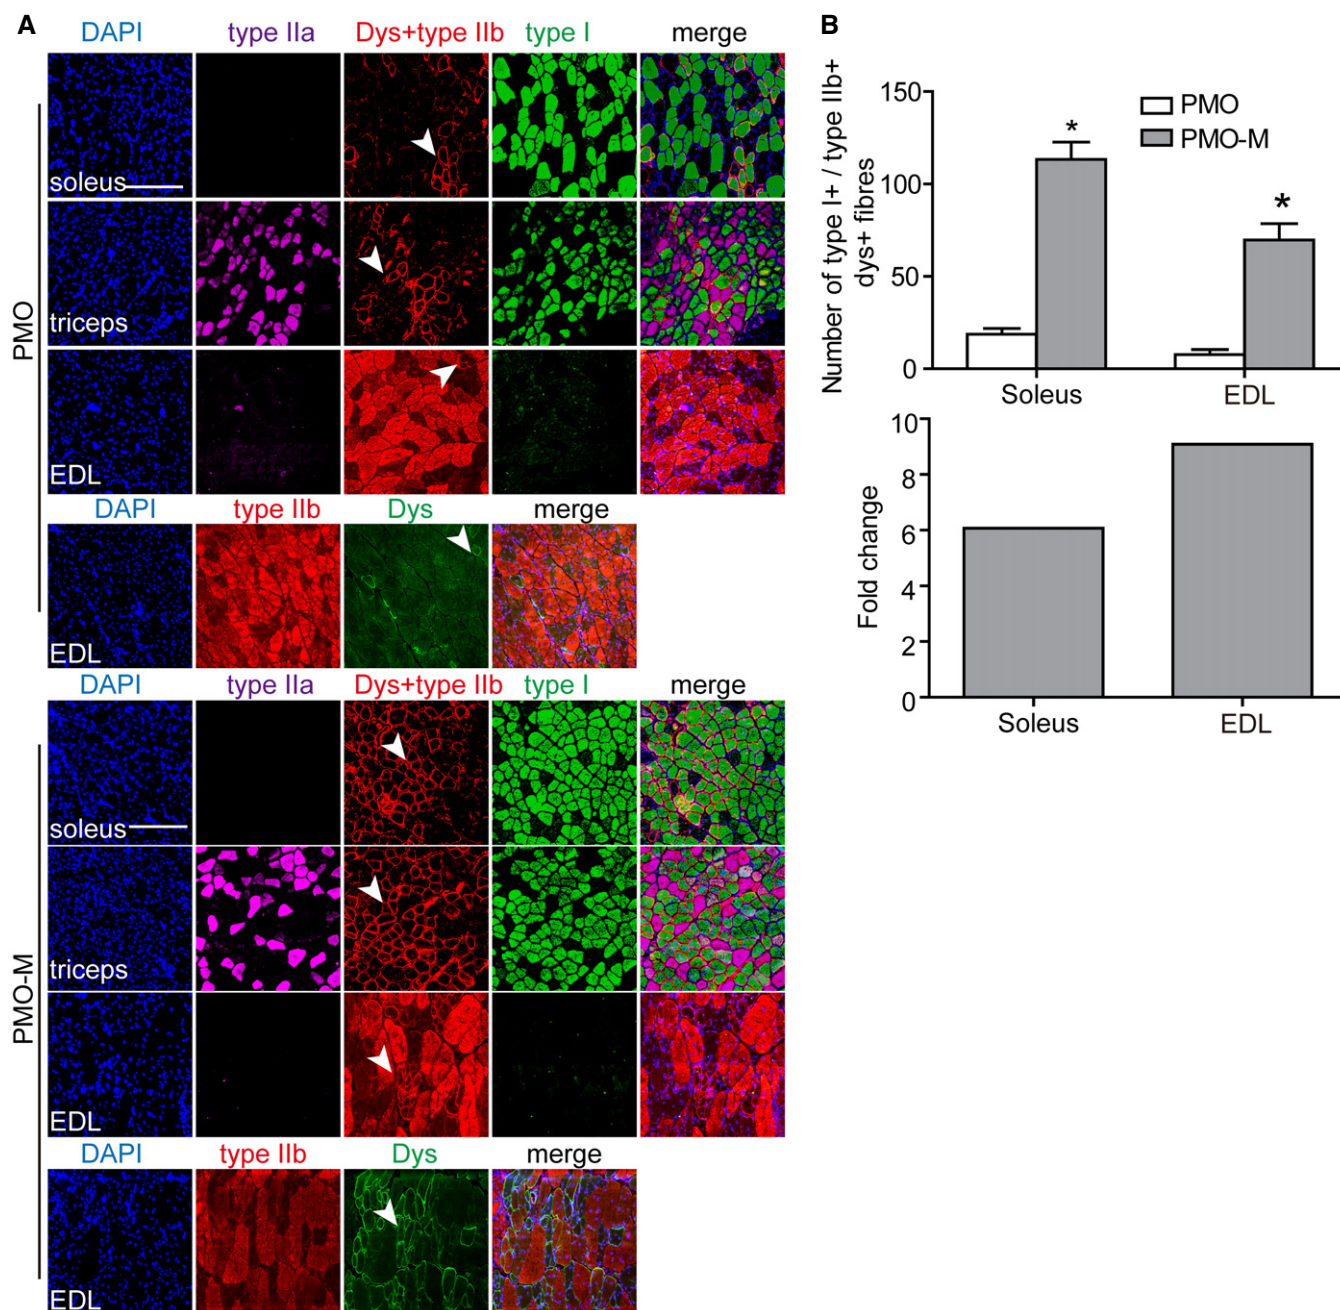

**Figure EV3. Examination of muscle fiber type-specific dystrophin expression in treated *mdx* mice.**

Adult *mdx* mice were intravenously injected with PMO at the dose of 12.5 mg/kg/week for 3 weeks mixed with MOTS-c (500  $\mu$ g), and tissues were harvested and examined two weeks after last injection.

**A** Immunohistochemistry for dystrophin expression in slow-twitch (soleus), fast-twitch (EDL), and mixed type (triceps) of muscle fibers of treated *mdx* mice (scale bar: 100  $\mu$ m). Type I MHC was used to identify slow-twitch muscle fibers, and type IIa and IIb MHC were used to characterize fast-twitch muscle fibers. The arrowheads point to dystrophin-positive fibers.

**B** Quantitative analysis of type I MHC- and dystrophin-positive or type IIb MHC- and dystrophin-positive fibers in treated *mdx* mice ( $n = 3$ ;  $*P < 0.05$ , two-tailed  $t$ -test). Type I<sup>+</sup> or type IIb<sup>+</sup> means type I MHC-positive or type IIb MHC-positive fibers, respectively. Dys<sup>+</sup> represents dystrophin-positive fibers. Fold change refers to PMO-M relative to PMO alone.

Data information: Data were presented as mean  $\pm$  sem. Exact  $P$  values are specified in Appendix Table S1.

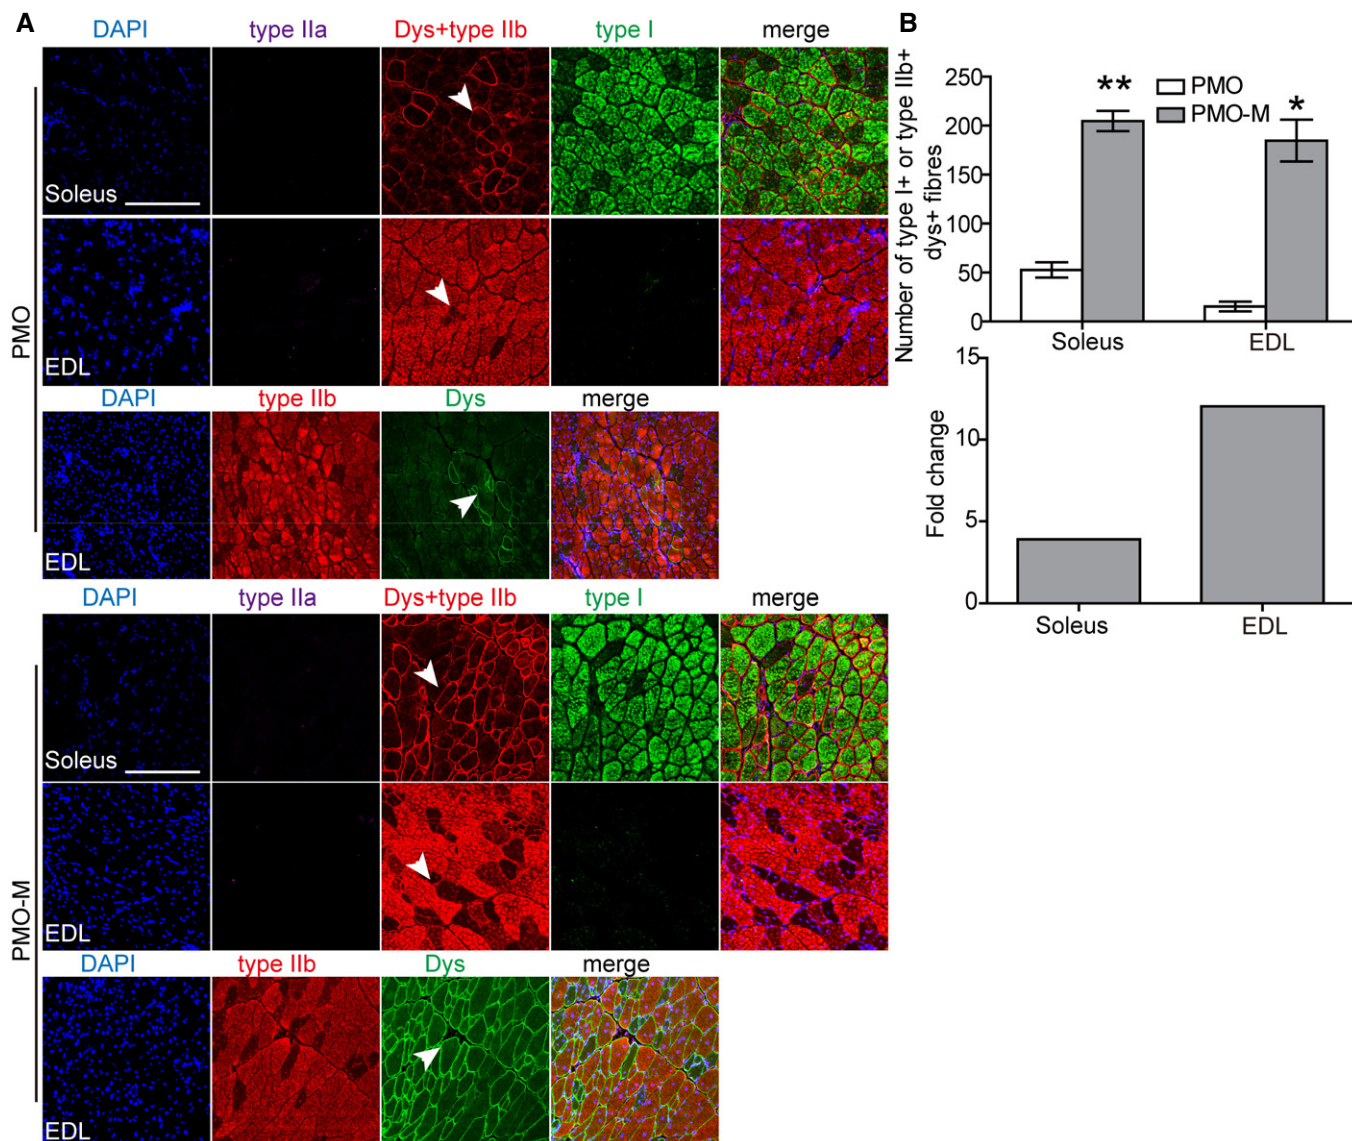

**Figure EV4. Effect of PMO-M on dystrophin expression in different muscle fiber types of treated *mdx* mice.**

PMO-M was administered intravenously into adult *mdx* mice at the PMO dose of 12.5 mg/kg/week for 3 weeks followed by 12.5 mg/kg/month for 3 months, and tissues were harvested two weeks after last injection.

A Immunohistochemistry for dystrophin expression in slow-twitch (soleus) and fast-twitch (EDL) muscle fibers of treated *mdx* mice (scale bar: 100  $\mu$ m). Type I MHC was used to identify slow-twitch muscle fibers, and type IIa and IIb MHC were used to characterize fast-twitch muscle fibers. The arrowheads point to dystrophin-positive fibers.

B Quantitative analysis of type I MHC- and dystrophin-positive or type IIb MHC- and dystrophin-positive fibers in *mdx* mice treated with PMO-M ( $n = 4$ ) or PMO ( $n = 3$ ) (\* $P < 0.05$ , \*\* $P < 0.001$ , two-tailed  $t$ -test). Type I<sup>+</sup> or type IIb<sup>+</sup> means type I MHC-positive or type IIb MHC-positive fibers, respectively. Dys<sup>+</sup> represents dystrophin-positive fibers. Fold change refers to PMO-M relative to PMO alone.

Data information: Data were presented as mean  $\pm$  sem. Exact  $P$  values are specified in Appendix Table S1.

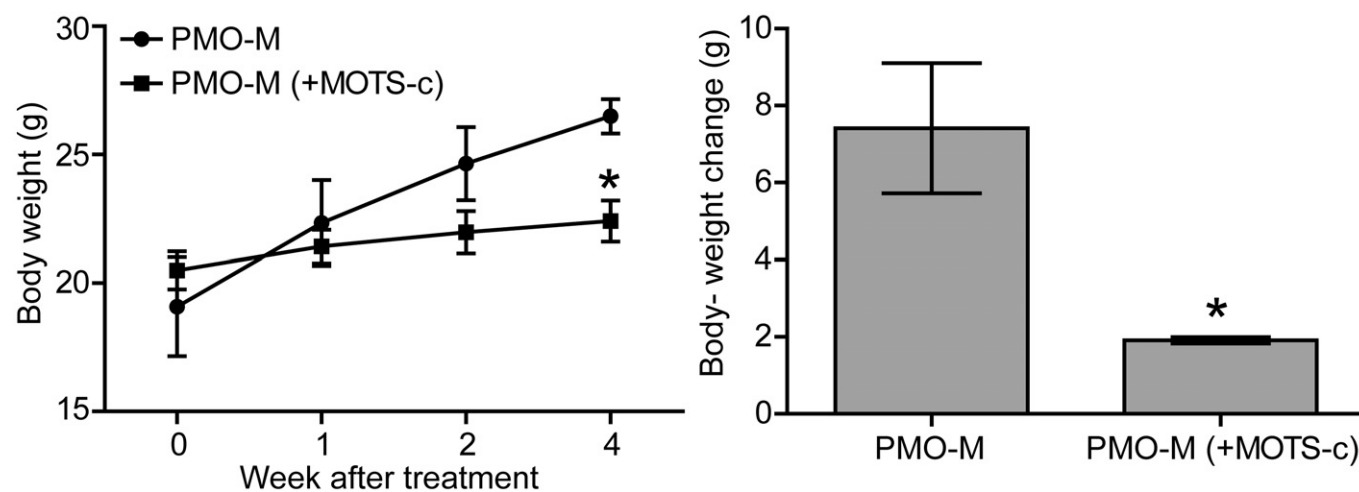

**Figure EV5. Measurement of body-weight changes of treated *mdx* mice.**

Adult *mdx* mice were treated with PMO-M or PMO-M with additional MOTS-c supply (500  $\mu$ g) (PMO-M (+MOTS-c)) at the PMO dose of 50 mg/kg/week for 3 weeks intravenously ( $n = 3$ ; \* $P < 0.05$ , two-tailed t-test).

Data information: Data were presented as mean  $\pm$  sem. Exact  $P$  values are specified in Appendix Table S1.
